# Supplementary figures and images for: A single-chain and fast-responding light-inducible Cre recombinase as a novel optogenetic switch
Source: eLife journal article supplement (doi:10.7554/elife.61268), 2021-02-23

**a**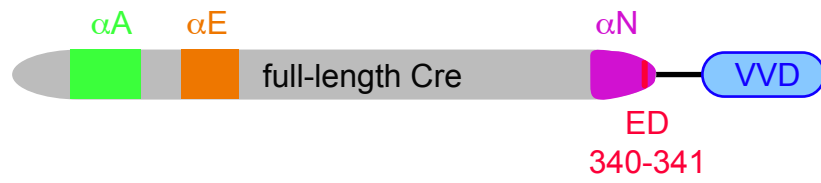**b**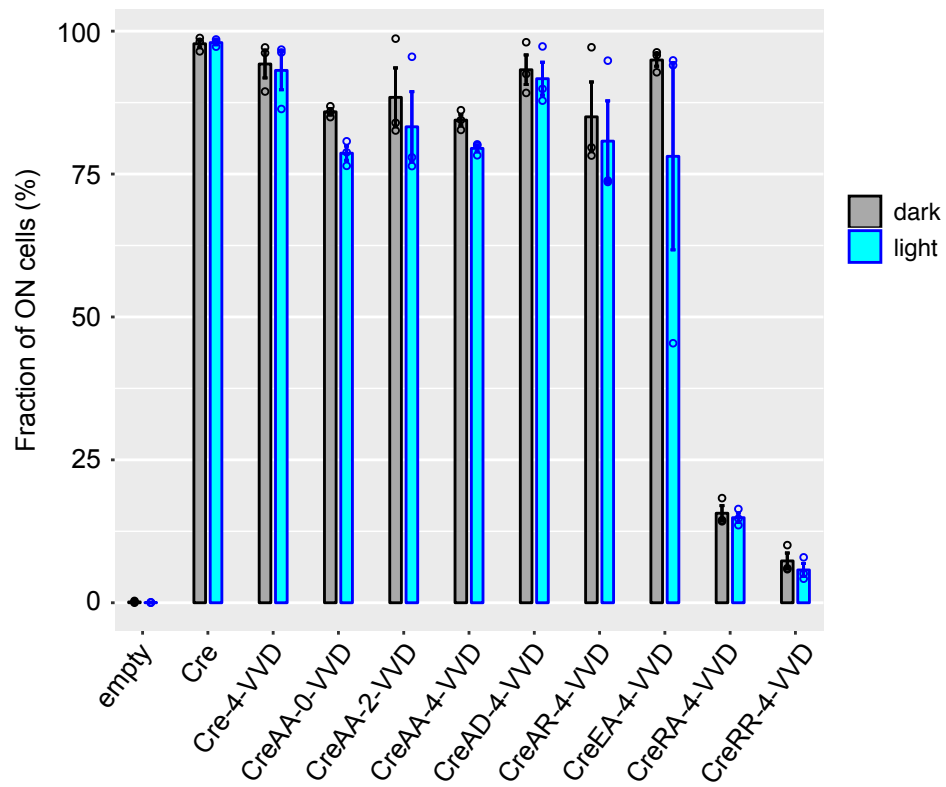

Supplement: supp [file elife_poa_e61268_Figure_2_figure_supplement_1.pdf › elife_poa_e61268_Figure_2_figure_supplement_1.pdf]

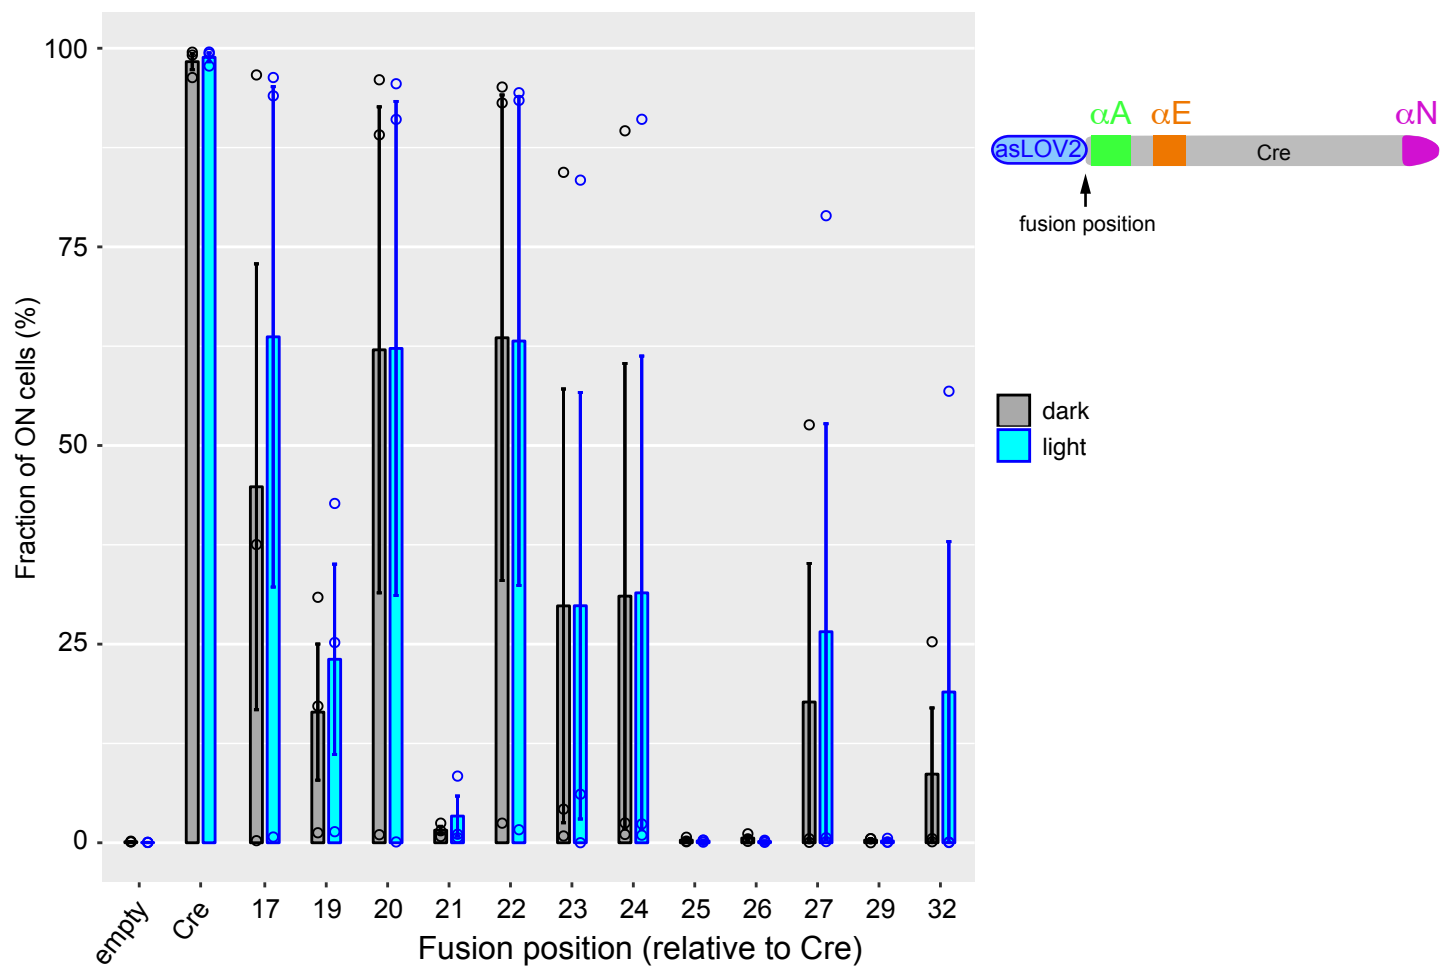

Supplement: supp [file elife_poa_e61268_Figure_2_figure_supplement_2.pdf › elife_poa_e61268_Figure_2_figure_supplement_2.pdf]

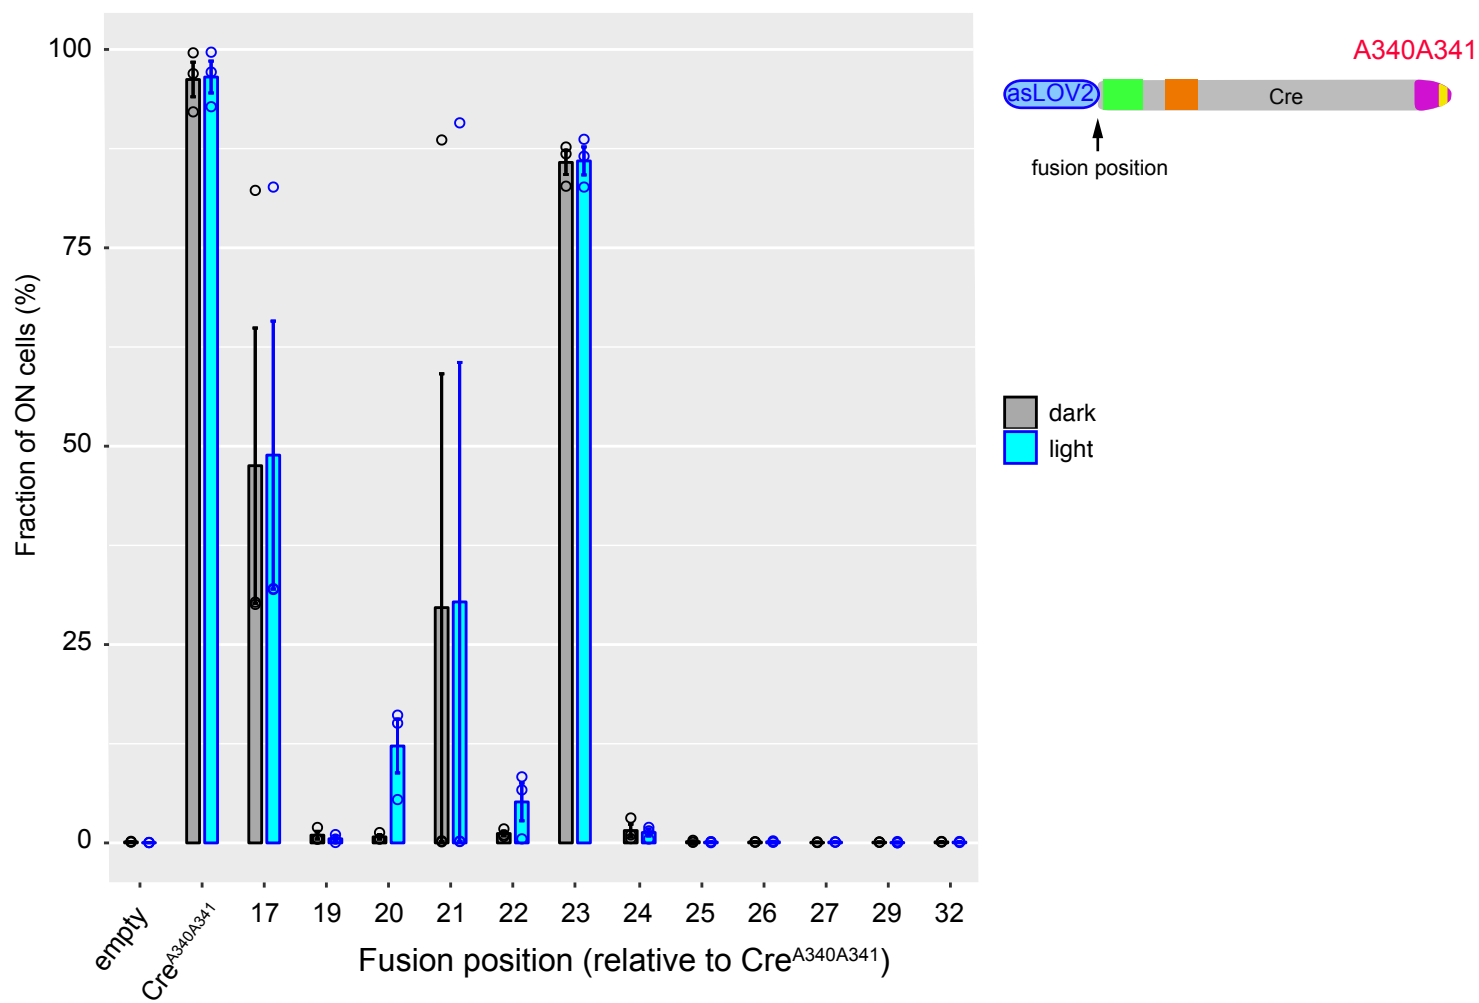

Supplement: supp [file elife_poa_e61268_Figure_2_figure_supplement_3.pdf › elife_poa_e61268_Figure_2_figure_supplement_3.pdf]

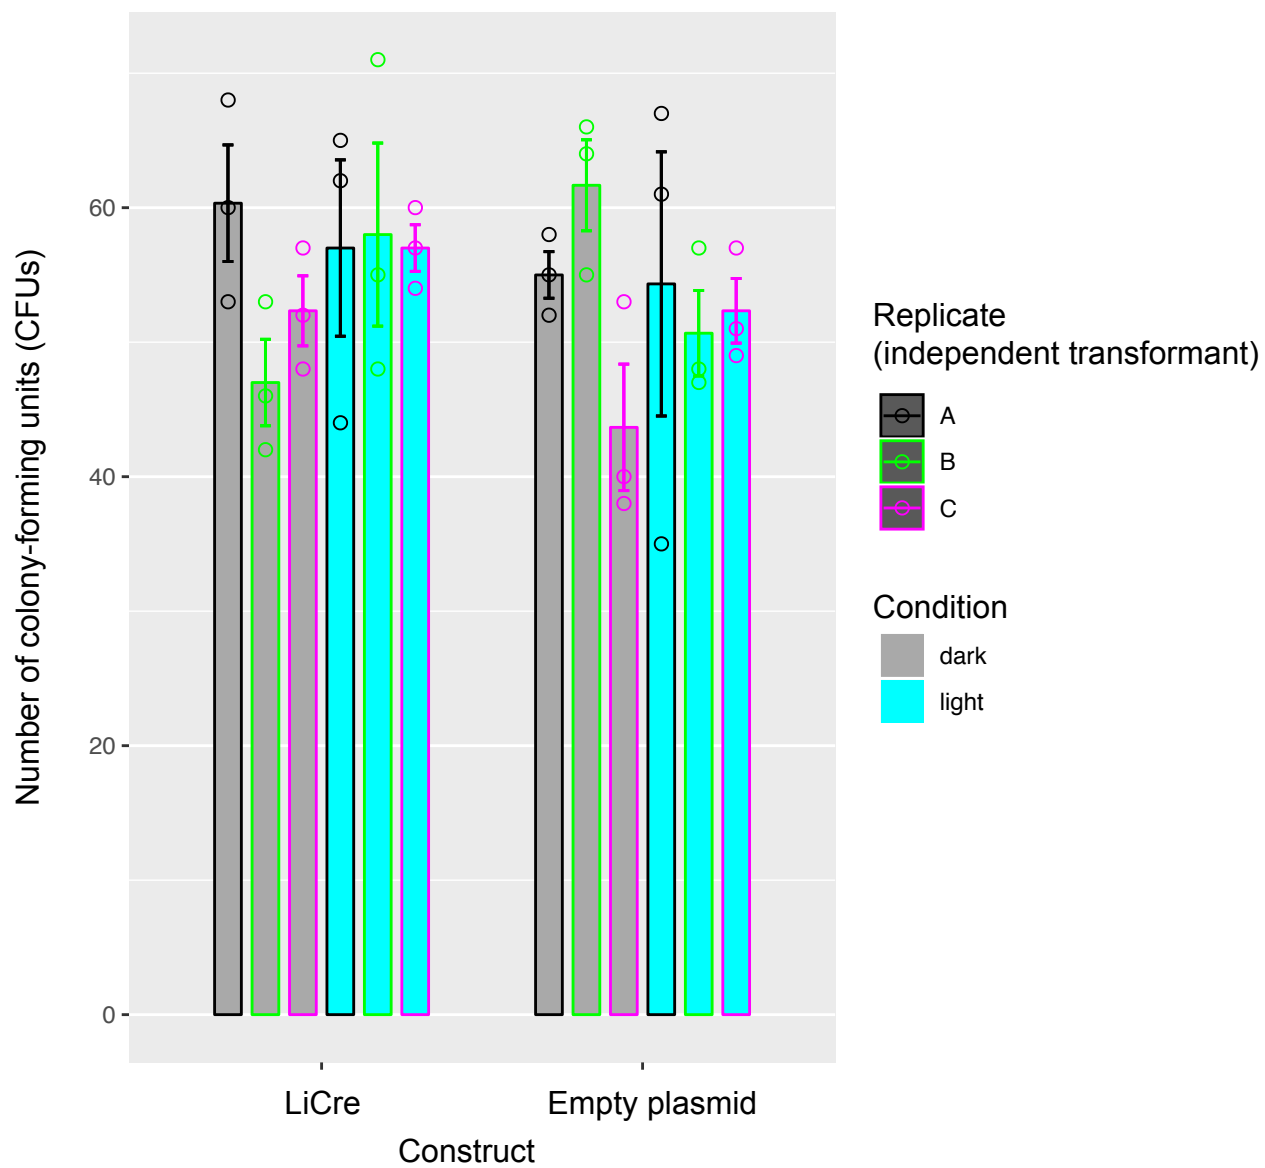

Supplement: supp [file elife_poa_e61268_Figure_3_figure_supplement_1.pdf › elife_poa_e61268_Figure_3_figure_supplement_1.pdf]
